# Supplementary material for: Bioinformatics and Connectivity Map Analysis Suggest Viral Infection as a Critical Causative Factor of Hashimoto’s Thyroiditis
Source: Preprints.org preprint supplement (doi:10.20944/preprints202212.0275.v1), 2022-12-15
Supplement: Supplementary file 1 [file supplementary]

**
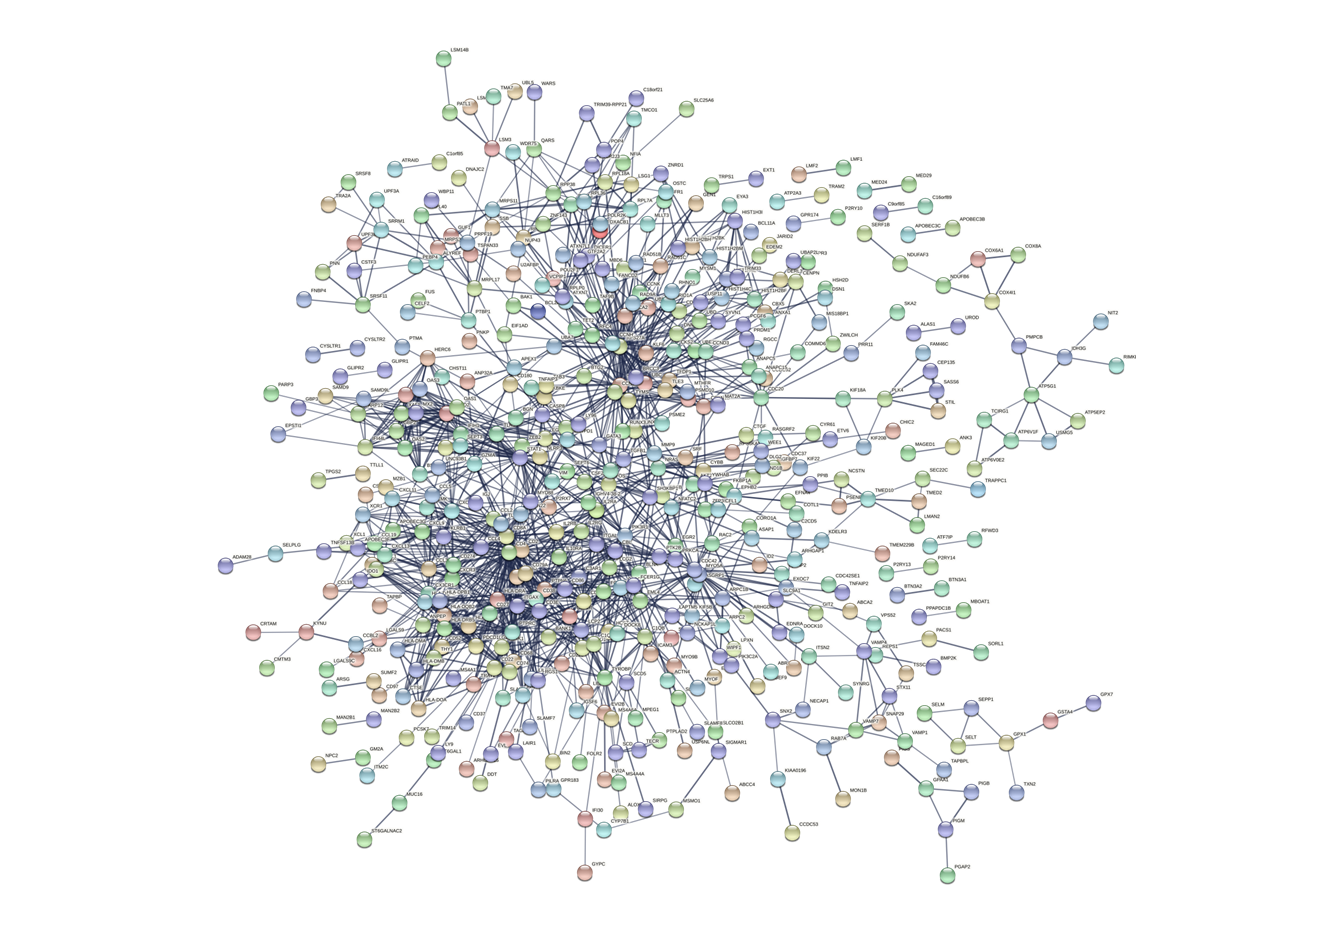
**

**Fig. S1 PPI network of upregulated DEGs in the HT group obtained from thyroid tissue microarray data.**

**
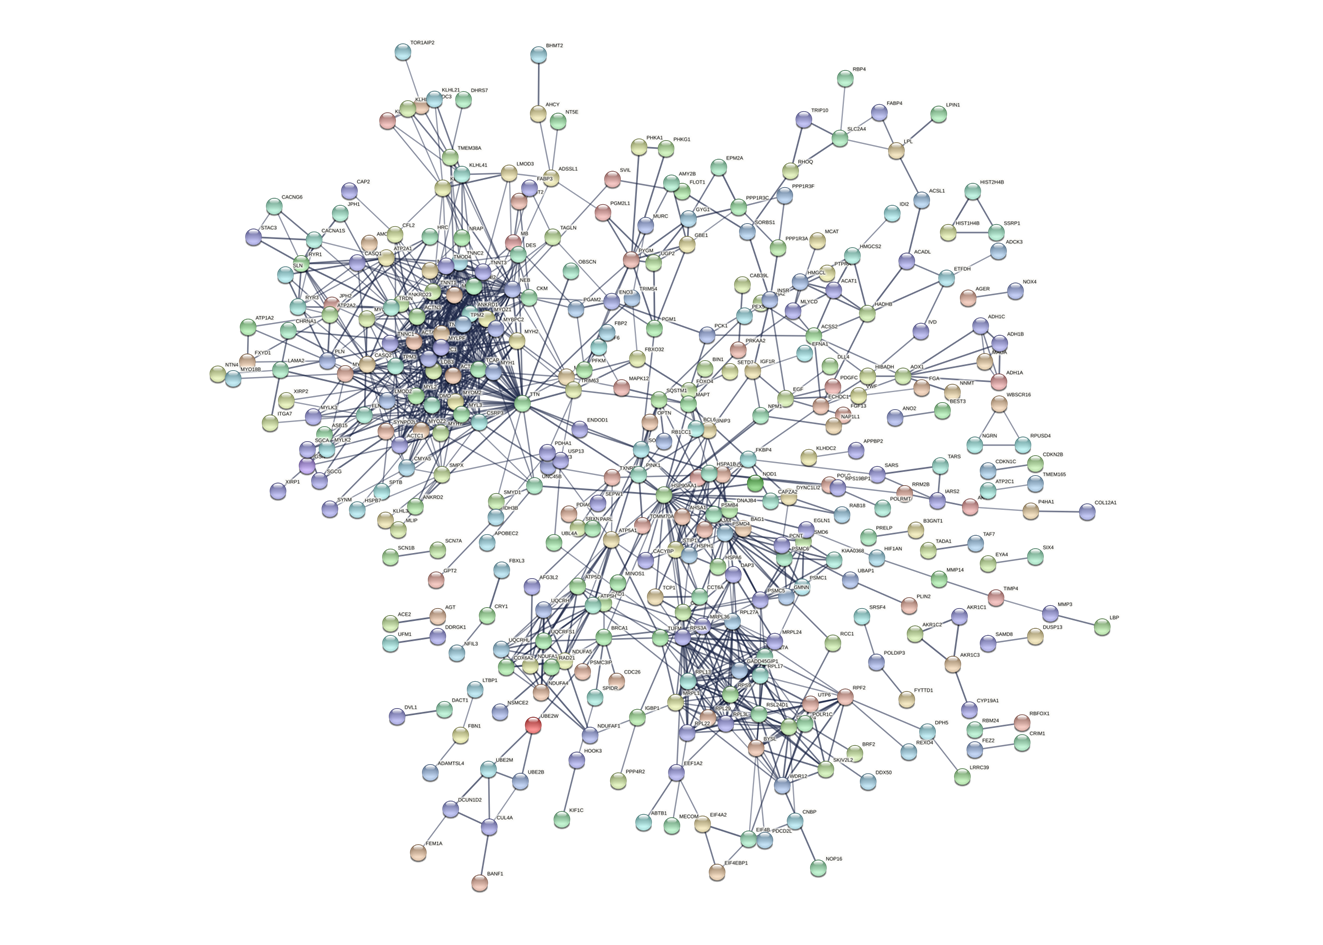
**

**Fig. S2 Total PPI network of downregulated DEGs in the HT group obtained from thyroid tissue microarray data.**

**
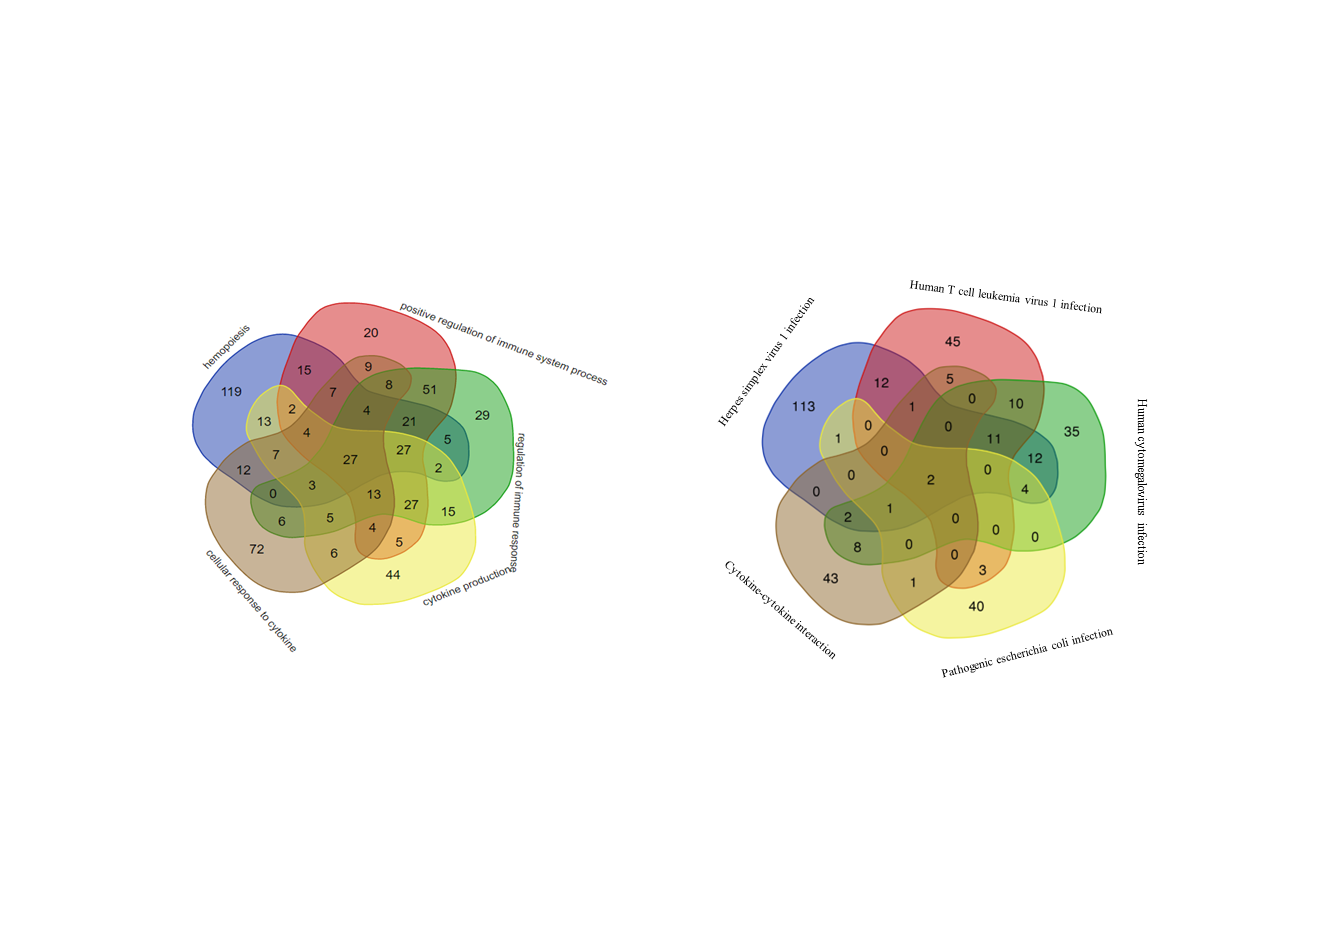
**

**Fig. S3 Venn diagram showing gene distribution for the top five significant (A) BP terms and (B) KEGG pathways of the HT group. Total gene lists are provided as a supplementary data file.**
