# Supplementary material for: Bioinformatics and Connectivity Map Analysis Suggest Viral Infection as a Critical Causative Factor of Hashimoto’s Thyroiditis
Source: Preprints.org preprint supplement (doi:10.20944/preprints202212.0275.v1), 2022-12-15
Supplement: Supplementary file 3 [file gseGO 5 cluster BP gene overlapping.xlsx]

## Sheet: Gene lists from Top 5 BP
	1. hemopoiesis
	2. positive regulation of immune system process
	3. regulation of immune response
	4. cytokine production
	5. cellular response to cytokine
	1. hemopoiesis				2. positive regulation of immune system process					3. regulation of immune response					4. cytokine production				5. cellular response to cytokine
	MS4A1				CXCL10					IGKC					HLA-DPB1				CXCL10
	CD79A				IGKC					CXCL13					EGR1				CXCL9
	EVI2B				CXCL13					MS4A1					SLAMF6				CXCL13
	CD27				MS4A1					CD79A					CD96				IL2RG
	CR2				CD79A					CCL5					CCL19				CCL5
	GPR183				CCL5					HLA-DPB1					PTPRC				EGR1
	HLA-DRA				HLA-DQA2					IGHM					ZFP36				SELPLG
	EGR1				HLA-DPB1					IGHV3-48					PTPN22				CCL19
	DOCK10				EVI2B					CR2					RASGRP1				IL2RB
	SLAMF6				IGHM					CD22					CD84				PTPRC
	CD3G				CD27					HLA-DRA					GBP5				ZFP36
	SELPLG				IGHV3-48					SLAMF6					SCIMP				CCL2
	CCL19				CR2					CD96					TYROBP				GBP5
	PTPRC				CD22					CCL19					MIR21				CCL18
	ZFP36				GPR183					KLRC4-KLRK1					CYBB				MIR21
	BLNK				HLA-DRA					PTPRC					CD3E				HLA-DPA1
	PTPN22				SLAMF6					BLNK					HLA-DPA1				STAP1
	RASGRP1				CCL19					PTPN22					ITK				CXCL11
	PRDM1				KLRC4-KLRK1					RASGRP1					XCL1				XCL1
	UBD				PTPRC					TRAT1					CD4				CCL4L1
	TYROBP				BLNK					CD84					NCKAP1L				CD4
	MIR21				PTPN22					IGHA1					CD74				CD74
	FCRL3				RASGRP1					GBP5					TNFAIP3				DOCK8
	TNFSF8				HLA-DMA					SCIMP					PDCD1LG2				TNFAIP3
	CD3E				TRAT1					LCP2					LAPTM5				CORO1A
	FOS				CCL2					TYROBP					PIK3CG				LAPTM5
	HLA-DOA				CD84					MIR21					LY96				BIRC3
	ITK				IGHA1					FCRL3					CD86				TNFRSF17
	CD3D				GBP5					FPR3					CD2				CLDN1
	MMP9				SCIMP					CD3E					LY9				CCL21
	TOX				LCP2					RAC2					CD226				CCR7
	CD4				TYROBP					ITK					BANK1				TNFSF13B
	NCKAP1L				MIR21					STAP1					CCR7				KIF5B
	RHOH				FCRL3					GCSAM					LGALS9				IL10RA
	IKZF3				FPR3					XCL1					PYHIN1				LGALS9
	CD74				CD3E					BTLA					LILRB4				PYHIN1
	SLAMF8				FOS					CD4					AIM2				LILRB4
	IKZF1				HLA-DPA1					NCKAP1L					CD28				IL7R
	CD86				HLA-DOA					LPXN					BTN3A1				AIM2
	DOCK2				ICOS					CD74					PLCG2				CXCR4
	TESPA1				RAC2					APOBEC3G					BTN3A2				GBP3
	CD2				ITK					TNFAIP3					GPR18				STAT4
	LY9				STAP1					SLAMF8					IRF8				IRF8
	CCR7				GCSAM					LAPTM5					CASP8				CASP8
	TNFSF13B				XCL1					LY96					BTK				BTK
	RASSF2				TOX					CD86					TMEM106A				TLR3
	LGALS9				CD4					BIRC3					TLR3				IL18
	LILRB4				NCKAP1L					FCGR2A					C3AR1				ITGA4
	IL7R				LPXN					TESPA1					IL18				GBP2
	KLF6				RHOH					CD226					SLAMF1				CCL4
	CD28				CD74					LAX1					PTPN6				PTPN6
	CTLA4				DOCK8					BANK1					ALOX5				XCR1
	PLCG2				SIRPG					SLC15A2					DDT				CSF2RA
	GPR18				PDCD1LG2					CCR7					OAS2				IL2RA
	IRF8				CORO1A					CD38					POU2AF1				OAS2
	TOP2A				HLA-DQB2					TNFSF13B					SNAI2				CXCR5
	CASP8				LAPTM5					PARP3					AIF1				AIF1
	BTK				HLA-DOB					LGALS9					STAT1				STAT1
	C1QC				CD86					PYHIN1					LEF1				LEF1
	TLR3				TESPA1					LILRB4					ANXA1				OAS1
	IL18				HLA-DQA1					IL7R					ABCD2				GBP4
	ITGA4				CD2					AIM2					OAS1				NLRC5
	SYVN1				CD226					PRKCB					LGALS9C				TXK
	SLAMF1				LAX1					HLA-DMB					CRTAM				CSF1R
	PTPN6				BANK1					CD28					TLR7				FCER1G
	CD8A				CCL21					UNC93B1					ADGRG1				TCL1A
	DUSP10				CCR7					CTLA4					TXK				CDC37
	IL2RA				CD38					BTN3A1					CSF1R				LILRB1
	POU2AF1				MZB1					PLCG2					TLR10				TNFRSF21
	STAT1				TNFSF13B					C1QB					GPSM3				DUOX2
	LEF1				LGALS9					KLHL6					FCER1G				KMO
	ANXA1				PYHIN1					BTN3A2					TGFB1				CSF2RB
	THEMIS				LILRB4					CD48					ATF4				RPLP0
	CRTAM				IL7R					CASP8					LILRB1				CCL3
	PLEK				AIM2					SH2D1A					TNFRSF21				MYD88
	RAG2				PRKCB					SERPINB9					BST2				TRAF5
	ID2				HLA-DMB					BTK					NFATC2				WAS
	CSF1R				CD28					C1QC					SORL1				CASP1
	FCER1G				CTLA4					THY1					INPP5D				ACTN4
	TGFB1				BTN3A1					THEMIS2					TLR6				PLP2
	BRCA2				PLCG2					TLR3					PTGS2				IKBKE
	ATF4				C1QB					C3AR1					CD40LG				PTK2B
	LILRB1				KLHL6					IL18					MCOLN2				MYBL2
	EGR3				BTN3A2					HCST					CD200				VCAM1
	INPP5D				CASP8					SLAMF1					MIR155				SPOCK2
	GPR137B				SH2D1A					PTPN6					TIGIT				TP53
	CD40LG				BTK					DUSP10					CCL3				CCR2
	RUNX2				C1QC					MYO1G					MYD88				JAK3
	RUNX3				THY1					STAT1					DENND1B				MMP12
	CCL3				THEMIS2					ANXA1					UBE2J1				ZBP1
	LRRK1				C3AR1					THEMIS					RSAD2				CMKLR1
	RSAD2				IL18					OAS1					HLA-DRB1				JARID2
	ALAS1				ITGA4					CRTAM					CD80				SNX10
	HLA-DRB1				SLAMF1					TLR7					CASP1				ADIPOR2
	CD80				CCL4					ITGB2					HAVCR2				CTBP2
	PRRC2C				PTPN6					NLRC5					RGCC				CX3CR1
	GPR171				DUSP10					FCGR2C					LTF				CBL
	ESCO2				IL2RA					TXK					P2RX7				TCIRG1
	LTF				CD5					TLR10					NR4A3				RIPK2
	SEMA4A				AIF1					FCER1G					DICER1				CCR1
	SRF				MYO1G					CDC37					CCR2				IFI16
	PLA2G2D				LEF1					TGFB1					JAK3				CCR4
	PTK2B				ANXA1					LILRB1					MMP12				OAS3
	VCAM1				THEMIS					TNFRSF21					CMKLR1				MAT2A
	TP53				CTSC					NFATC2					IGF2BP3				CDC42
	MLLT3				CRTAM					INPP5D					MIR221				SLIT3
	CCR2				ID2					TLR6					IFIH1				CXCR3
	JAK3				ITGB2					CD200					GPNMB				VIM
	JUNB				NLRC5					APOBEC3F					IRF4				GATA3
	MIR221				TXK					MYD88					CARD11				PPARGC1A
	LCK				CSF1R					PIK3AP1					LYN				RNF125
	SNX10				GPSM3					VAMP7					CX3CR1				IL6
	ETV6				FCER1G					GPX1					IL16				EXT1
	IRF4				TGFB1					DENND1B					SASH3				HCLS1
	CARD11				LILRB1					CTSS					REL				HELLS
	LYN				TNFRSF21					RSAD2					TMED10				IL1RN
	SASH3				NFATC2					HLA-DRB1					RIPK2				IL21R
	TCIRG1				EGR3					WAS					CD274				IL1B
	TET2				INPP5D					CD80					RNF26				SPRY4
	PRKCA				TLR6					HAVCR2					NLRP3				CCL3L3
	RIPK2				CD40LG					RGCC					PIK3R1				TRAF1
	BAK1				CAMK1D					LTF					IFI16				CCL8
	NLRP3				SH3KBP1					CD247					MYB				KLF4
	TPD52				RUNX3					NR4A3					OAS3				MIR27B
	PIK3R1				CCL3					SLA2					CD6				ZFP36L2
	CCR1				MYD88					IKBKE					ARRB2				ZNF675
	IFI16				VAMP7					PLA2G2D					EPHB2				SPI1
	MYB				DENND1B					FCER2					PTAFR				MNDA
	CDC42				RSAD2					CMTM3					GATA3				SLIT2
	VAV1				HLA-DRB1					CCR2					RNF125				TNF
	MR1				CD80					CD1E					IL6				LSP1
	JUN				HAVCR2					JAK3					BTN3A3				MED1
	FGL2				RGCC					MMP12					PTGER4				CASP4
	GATA3				RASAL3					ZBP1					ACP5				CCL22
	BCL11B				CD247					CMKLR1					HLA-F				IFI27
	IL6				NR4A3					LCK					SPN				IFITM3
	EXT1				SLA2					C1QA					IL1B				WNK1
	HCLS1				IKBKE					IFIH1					CLEC4A				IL4R
	CDK6				FCER2					IRF4					EZH2				CXCL12
	PTGER4				CMTM3					CD1C					KLF4				IFITM1
	MYSM1				PTK2B					CARD11					MIR27B				PFKP
	SPN				VCAM1					LYN					MNDA				IL5RA
	IL1B				CCR2					SASH3					CDH3				NRP2
	TIPARP				HLA-DRB5					RIPK2					CD14				CXCR6
	EZH2				CD1E					FKBP1A					TNF				CD58
	PREX1				JAK3					CD274					CHID1				PARP14
	CARTPT				MMP12					RNF26					LTA				LILRA6
	KLF4				ZBP1					NLRP3					C5AR1				TREM2
	FLI1				CMKLR1					IFI16					PER1				LILRB2
	ZFP36L2				LCK					MYB					CLNK				CEACAM1
	MFNG				C1QA					C2					TLR8				CCR6
	MEF2C				CD1C					AHR					MIF				OASL
	ZNF675				CARD11					OAS3					IL4R				LRCH1
	SPI1				LYN					VAV1					CD33				SOCS1
	ST3GAL1				CX3CR1					MR1					IL5RA				XCL2
	WASF2				SASH3					APOE					CD58				ALAD
	TMEM14C				PRKCA					ARRB2					CD200R1				HCK
	NBEAL2				RIPK2					PTAFR					PRKD2				DTX1
	SIPA1L3				P2RY12					FGL2					CLEC7A				SH2B3
	SOS2				CD274					GATA3					UBASH3A				EBI3
	TNF				NLRP3					RNF125					TREM2				NCL
	MED1				CCR1					FCGR3B					TLR1				IL7
	CAMK4				IFI16					IL6					LILRB2				TANK
	CD79B				MYB					CACNB3					TSPO				FLT3
	MELK				C2					SAMSN1					BAP1				CD300LF
	NFKBID				CD6					TRBC1					CEACAM1				SIGIRR
	IL4R				VAV1					BTN3A3					SOCS1				TLR2
	ZAP70				MR1					HLA-F					FCGR2B				JAK2
	TREM2				JUN					SPN					DDX58				OTUB1
	IL4I1				EPHB2					FCGR3A					EBI3				TCF7
	LILRB2				PTAFR					ADGRE2					IL7				NMI
	CEACAM1				GATA3					IL1B					NRROS				PYCARD
	ZFAT				IL6					PRKCH					PIK3CD				CD44
	EOMES				CACNB3					KIR2DS2					HEG1				LILRA1
	KMT2E				HCLS1					MEF2C					SIGIRR				IL18BP
	CCR6				TRBC1					SPI1					TLR2				SPATA2
	SOCS1				BTN3A3					CD8B					JAK2				ZC3H15
	FCGR2B				HLA-F					MNDA					NMI				VRK2
	DTX1				SPN					PVRIG					NFATC3				IFIT3
	SH2B3				ADGRE2					SKAP1					PYCARD				GBA
	SFRP2				PGF					PDPK1					CR1				KLF2
	ATP6AP1				IL1B					MAPK10					ZP3				MT2A
	LDB1				CCL8					CD14					GBA				TRAF3
	IL7				PRKCH					TNF					KLF2				CNOT9
	RRAS				KIR2DS2					MED1					ADCY7				ST3GAL6
	CD19				MEF2C					HLA-DQB1					TRAF3				FAS
	FLT3				SPI1					LTA					TLR5				GBP6
	FLVCR1				MNDA					C5AR1					BTN2A2
	CASP3				PVRIG					CD79B					SYT11
	NRROS				SKAP1					CLNK					NLRC3
	MSH2				PDPK1					MICB					PARK7
	PIK3CD				TNF					TLR8					IFNG
	CD164				MED1					WNK1					CD160
	KMT2A				HLA-DQB1					NFKBID					FOXP3
	DNASE2				LTA					IL4R					CYLD
	NCOA6				C5AR1					LIMK1					HK1
	TLR2				CD79B					KLRD1					EIF2AK3
	JAK2				CLNK					CD33					CD83
	TCF7				MICB					VAV2					TSKU
	RTKN2				TLR8					PARP14					CLECL1
	PTBP3				WNK1					CD200R1					BCL10
	RB1				NFKBID					PRKD2					CD34
	ETS1				MIF					CLEC7A					NFAT5
	CR1				IL4R					UBASH3A					POU2F2
	ROR2				CXCL12					ZAP70
	ENTPD7				LIMK1					FYN
	CRACR2A				CREB3					TREM2
	GBA				KLRD1					IL4I1
	CHD7				VAV2					TLR1
	KLF2				PRKD2					LILRB2
	EIF6				CLEC7A					CEACAM1
	CITED2				UBASH3A					OASL
	VEGFA				ZAP70					SOCS1
	FANCA				FYN					FCGR2B
	PIP4K2A				TREM2					HCK
	WDR61				IL4I1					DDX60
	ITM2A				LILRB2					DDX58
	AICDA				CEACAM1					CD19
	IFNG				CCR6					CD300LF
	FOXP3				LGMN					PCBP2
	ATP7A				JUND					UNC13D
	ABI1				SIRPB1					MSH2
	BCL2				SOCS1					PIK3CD
	CD83				FCGR2B					ITGAM
	RPS19				XCL2					SFPQ
	SOS1				HCK					DNASE2
	ZBTB24				DDX60					TLR2
	CD34				DDX58					NMI
	EIF2AK1				ATP6AP1					PYCARD
	DOCK11				EBI3					CR1
	ZMIZ1				IL7					ZP3
	RPS14				CD19					PIGR
	GAB3				UNC13D					CTSH
	CNN2				MSH2					PLA2G6
	TNFSF18				PIK3CD					ENTPD7
	CDK13				ITGAM					TNIP3
	MIR17HG				SFPQ					PRKCD
	RIPK3				NMI					ADCY7
	RUNX1				PYCARD					CBLB
	JAM3				RB1					TRAF3
	MIR223				CR1					TLR5
	TTC7A				ROR2					BTN2A2
	ERCC2				ZP3					PAK1
	IRF1				PLA2G6
	IL12RB1
	AGPAT5
	CD46
	STAT6
	PTPRJ
	CLPTM1
	STK4
	RC3H1
	VNN1
	MALT1
	BATF2
	PLD4
	ADD2
	B2M
	PIK3R6
	LGALS1
	TESC
	G6PD
	CNOT4
	HES1
	EIF2AK2
	SETD1A
	PPP2R3C
	ZNF385A

## Sheet: Organized gene lists
Overlapping BP terms	Counts	Genes
cellular response to cytokine	27	LILRB2
cytokine production		CD4
hemopoiesis		GATA3
positive regulation of immune system process		LILRB1
regulation of immune response		TREM2
		CCL19
		LILRB4
		CD74
		LGALS9
		CASP8
		SOCS1
		PTPN6
		RIPK2
		BTK
		IFI16
		IL4R
		TNF
		CCR2
		JAK3
		IL1B
		IL18
		FCER1G
		CEACAM1
		MIR21
		IL6
		CCR7
		PTPRC
cytokine production	27	CRTAM
hemopoiesis		ANXA1
positive regulation of immune system process		TYROBP
regulation of immune response		SPN
		PLCG2
		NLRP3
		PTPN22
		LYN
		FCGR2B
		CD80
		RASGRP1
		CARD11
		CD28
		SASH3
		NCKAP1L
		SLAMF1
		INPP5D
		RSAD2
		HLA-DRB1
		ITK
		PIK3CD
		TGFB1
		CD86
		CD3E
		SLAMF6
		CR1
		MYB
cellular response to cytokine	4	SPI1
hemopoiesis		TNFSF13B
positive regulation of immune system process		MED1
regulation of immune response		IL7R
cellular response to cytokine	4	LEF1
cytokine production		CCL3
hemopoiesis		CSF1R
positive regulation of immune system process		IL7
cellular response to cytokine	3	TLR2
cytokine production		STAT1
hemopoiesis		TLR3
regulation of immune response
cellular response to cytokine	13	XCL1
cytokine production		MYD88
positive regulation of immune system process		TXK
regulation of immune response		TNFRSF21
		MNDA
		NMI
		LAPTM5
		AIM2
		PYHIN1
		CMKLR1
		GBP5
		PYCARD
		MMP12
hemopoiesis	21	ZAP70
positive regulation of immune system process		BLNK
regulation of immune response		C1QC
		MS4A1
		TESPA1
		CD79A
		CTLA4
		HLA-DRA
		CD19
		FCRL3
		MSH2
		CR2
		LCK
		NFKBID
		IL4I1
		CD79B
		MR1
		DUSP10
		THEMIS
		VAV1
		MEF2C
cytokine production	2	CD2
hemopoiesis		CD40LG
positive regulation of immune system process
cellular response to cytokine	7	PTK2B
hemopoiesis		CCR6
positive regulation of immune system process		IL2RA
		CCR1
		VCAM1
		HCLS1
		ITGA4
cytokine production	2	IRF4
hemopoiesis		LTF
regulation of immune response
cellular response to cytokine	7	EGR1
cytokine production		KLF4
hemopoiesis		ZFP36
		KLF2
		JAK2
		IRF8
		GBA
cytokine production	27	CLNK
positive regulation of immune system process		HLA-F
regulation of immune response		BANK1
		C5AR1
		DENND1B
		PRKD2
		BTN3A2
		BTN3A1
		CLEC7A
		C3AR1
		HLA-DPB1
		TLR6
		SCIMP
		BTN3A3
		NFATC2
		PTAFR
		CD84
		TLR8
		DDX58
		CD226
		RGCC
		LTA
		NR4A3
		HAVCR2
		CD274
		ZP3
		UBASH3A
cellular response to cytokine	8	CXCL13
positive regulation of immune system process		NLRC5
regulation of immune response		IKBKE
		STAP1
		HCK
		CCL5
		WNK1
		ZBP1
cellular response to cytokine	4	EBI3
cytokine production		HLA-DPA1
positive regulation of immune system process		CX3CR1
		AIF1
cellular response to cytokine	5	TRAF3
cytokine production		OAS3
regulation of immune response		OAS1
		RNF125
		TNFAIP3
hemopoiesis	15	RUNX3
positive regulation of immune system process		GPR183
		ROR2
		FOS
		EVI2B
		RHOH
		ID2
		RB1
		HLA-DOA
		CD27
		ATP6AP1
		TOX
		JUN
		EGR3
		PRKCA
hemopoiesis	5	FGL2
regulation of immune response		DNASE2
		PLA2G2D
		ENTPD7
		SLAMF8
cytokine production	13	CD34
hemopoiesis		FOXP3
		EZH2
		POU2AF1
		IFNG
		PIK3R1
		MIR221
		CD83
		LY9
		GPR18
		ATF4
		NRROS
		PTGER4
cellular response to cytokine hemopoiesis	12	EXT1
		FLT3
		SELPLG
		TCIRG1
		SH2B3
		DTX1
		SNX10
		ZFP36L2
		TP53
		CDC42
		TCF7
		ZNF675
positive regulation of immune system process regulation of immune response	51	ITGAM
		GCSAM
		SLA2
		SKAP1
		FPR3
		SH2D1A
		LAX1
		SFPQ
		PRKCB
		RAC2
		IGKC
		CACNB3
		CD38
		KIR2DS2
		MICB
		KLRC4-KLRK1
		IGHA1
		C2
		CD247
		CMTM3
		LPXN
		C1QB
		HLA-DQB1
		TRAT1
		PVRIG
		LCP2
		KLHL6
		PLA2G6
		CD1E
		IGHM
		FYN
		UNC13D
		FCER2
		HLA-DMB
		THY1
		DDX60
		PRKCH
		PDPK1
		CD22
		MYO1G
		TRBC1
		C1QA
		ADGRE2
		VAMP7
		ITGB2
		IGHV3-48
		LIMK1
		VAV2
		THEMIS2
		KLRD1
		CD1C
cytokine production positive regulation of immune system process	5	CD6
		GPSM3
		MIF
		PDCD1LG2
		EPHB2
cellular response to cytokine positive regulation of immune system process 9	9	DOCK8
		CCL8
		CXCL12
		CORO1A
		CXCL10
		CCL21
		CCL4
		CCL2
		XCL2
cytokine production regulation of immune response	15	ARRB2
		ADCY7
		CD33
		TLR1
		TLR10
		RNF26
		BTN2A2
		TLR7
		CD96
		IFIH1
		TLR5
		CD200
		CD200R1
		LY96
		CD14
cellular response to cytokine regulation of immune response 6	6	PARP14
		CDC37
		CD300LF
		WAS
		OASL
		BIRC3
cellular response to cytokine cytokine production	6	SIGIRR
		OAS2
		CD58
		IL5RA
		CASP1
		MIR27B
hemopoiesis	119	TPD52
		IL12RB1
		RTKN2
		EIF6
		CNN2
		SOS1
		EIF2AK2
		KMT2E
		CITED2
		MALT1
		WDR61
		NBEAL2
		BATF2
		BAK1
		DOCK2
		IRF1
		FLVCR1
		BRCA2
		PLEK
		RC3H1
		JAM3
		GPR137B
		CHD7
		LRRK1
		HES1
		RIPK3
		PTBP3
		MYSM1
		ST3GAL1
		CNOT4
		PIP4K2A
		IKZF1
		CDK13
		LGALS1
		VNN1
		ABI1
		PLD4
		MIR223
		JUNB
		TIPARP
		BCL2
		DOCK10
		CLPTM1
		TET2
		AICDA
		G6PD
		SOS2
		TNFSF8
		RASSF2
		TOP2A
		STK4
		IKZF3
		TMEM14C
		ETS1
		ATP7A
		GPR171
		CARTPT
		RPS19
		CAMK4
		RUNX1
		DOCK11
		KMT2A
		ITM2A
		RUNX2
		KLF6
		CD3G
		ESCO2
		SFRP2
		GAB3
		EIF2AK1
		CDK6
		FANCA
		SETD1A
		CRACR2A
		PPP2R3C
		ZMIZ1
		AGPAT5
		PTPRJ
		CD8A
		MIR17HG
		SEMA4A
		B2M
		SIPA1L3
		LDB1
		CD164
		PREX1
		SYVN1
		RRAS
		PRRC2C
		FLI1
		TNFSF18
		MELK
		MFNG
		ZNF385A
		CD46
		PIK3R6
		CD3D
		VEGFA
		STAT6
		ETV6
		TTC7A
		RAG2
		UBD
		EOMES
		TESC
		BCL11B
		MLLT3
		RPS14
		ALAS1
		SRF
		NCOA6
		ADD2
		ZFAT
		WASF2
		ZBTB24
		ERCC2
		PRDM1
		CASP3
		MMP9
positive regulation of immune system process	20	HLA-DRB5
		LGMN
		PGF
		MZB1
		HLA-DQA2
		CAMK1D
		CD5
		JUND
		HLA-DMA
		SH3KBP1
		SIRPB1
		SIRPG
		CREB3
		RASAL3
		HLA-DQB2
		ICOS
		P2RY12
		HLA-DOB
		HLA-DQA1
		CTSC
regulation of immune response	29	TNIP3
		PAK1
		FCGR2A
		BTLA
		SLC15A2
		HCST
		SERPINB9
		APOE
		SAMSN1
		FCGR2C
		PIK3AP1
		FCGR3B
		PIGR
		MAPK10
		PRKCD
		CD48
		AHR
		CBLB
		CTSS
		CD8B
		PARP3
		APOBEC3G
		UNC93B1
		FCGR3A
		PCBP2
		CTSH
		GPX1
		APOBEC3F
		FKBP1A
cytokine production	44	CDH3
		DDT
		IGF2BP3
		CHID1
		SORL1
		ALOX5
		BST2
		GPNMB
		ACP5
		TSKU
		CD160
		PIK3CG
		DICER1
		CLECL1
		TSPO
		CYBB
		LGALS9C
		MCOLN2
		SYT11
		MIR155
		BAP1
		CYLD
		TMED10
		ABCD2
		IL16
		REL
		TIGIT
		PARK7
		PTGS2
		PER1
		CLEC4A
		UBE2J1
		HK1
		NFAT5
		NFATC3
		TMEM106A
		P2RX7
		BCL10
		SNAI2
		POU2F2
		HEG1
		EIF2AK3
		NLRC3
		ADGRG1
cellular response to cytokine	72	ACTN4
		CD44
		PFKP
		CXCR4
		RPLP0
		IFITM3
		CCL18
		LSP1
		CCL22
		CCL3L3
		TRAF5
		PLP2
		CBL
		TCL1A
		CXCR3
		FAS
		SPOCK2
		KIF5B
		ALAD
		CXCL9
		STAT4
		HELLS
		GBP6
		JARID2
		DUOX2
		LILRA1
		NRP2
		NCL
		TRAF1
		CXCL11
		MYBL2
		LILRA6
		IL18BP
		IL1RN
		XCR1
		IFI27
		PPARGC1A
		IL10RA
		GBP3
		VRK2
		OTUB1
		CTBP2
		LRCH1
		VIM
		TANK
		SLIT3
		ADIPOR2
		TNFRSF17
		ST3GAL6
		SPRY4
		CSF2RA
		KMO
		CLDN1
		IL21R
		GBP2
		CXCR6
		CCL4L1
		SLIT2
		ZC3H15
		CASP4
		IFITM1
		SPATA2
		MT2A
		IL2RB
		GBP4
		MAT2A
		CSF2RB
		IFIT3
		CNOT9
		CCR4
		IL2RG
		CXCR5
