# Supplementary material for: Bioinformatics and Connectivity Map Analysis Suggest Viral Infection as a Critical Causative Factor of Hashimoto’s Thyroiditis
Source: Preprints.org preprint supplement (doi:10.20944/preprints202212.0275.v1), 2022-12-15
Supplement: Supplementary file 4 [file gseKEGG 5 cluster KEGG gene overlapping-MS.xlsx]

## Sheet: Gene lists from Top 5 KEGG
	1. Herpes simplex virus 1 infection
	2. Human T-cell leukemia virus 1 infection
	3. Human cytomegalovirus infection
	4. Pathogenic Escherichia coli infection
	5. Cytokine-cytokine receptor interaction
	1. Herpes simplex virus 1 infection				2. Human T-cell leukemia virus 1 infection				3. Human cytomegalovirus infection				4. Pathogenic Escherichia coli infection				5. Cytokine-cytokine receptor interaction
	CCL5				EGR2				CCL5				LOC102723407				CXCL10
	HLA-DQA2				IL2RG				CCL2				FOS				CXCL9
	HLA-DPB1				HLA-DQA2				RAC2				NCKAP1L				CXCL13
	HLA-DRA				HLA-DPB1				CCL4L1				WIPF1				IL2RG
	CCL2				HLA-DRA				IL10RA				FCGR2A				CCL5
	HLA-DMA				EGR1				PRKCB				CLDN1				CD27
	HLA-DOA				CD3G				CXCR4				CASP8				CCL19
	HLA-DPA1				IL2RB				CASP8				IL18				IL2RB
	CD74				ZFP36				CCL4				PTPN6				CCL2
	HLA-DOB				HLA-DMA				NFATC2				MYO1G				CCL18
	BIRC3				CD3E				PTGS2				ARPC1B				TNFSF8
	HLA-DQA1				FOS				PLCB2				CYTH4				CXCL11
	HLA-DMB				HLA-DOA				CCL3				CLDN7				XCL1
	CASP8				ITGAL				AKT2				MYD88				CCL4L1
	TLR3				CD3D				TRAF5				CASP1				CD4
	ALYREF				HLA-DPA1				CCND1				CYFIP2				CCL28
	OAS2				CD4				TAPBP				ARPC2				TNFRSF17
	STAT1				HLA-DOB				GNAO1				CYTH2				CCL21
	OAS1				HLA-DQA1				PTK2B				LPAR5				CCR7
	ZNF860				HLA-DMB				TP53				TAB3				TNFSF13B
	BST2				IL2RA				TAP1				CLDN16				IL10RA
	MYD88				CCNB2				TSC2				TMED10				IL7R
	AKT2				ITGB2				GNG2				MYO5A				TNFRSF9
	PILRA				TGFB1				PRKCA				BAK1				CXCR4
	TRAF5				NFATC2				BAK1				NLRP3				IL18
	HLA-DRB1				ANAPC5				PIK3R1				MYO5B				CCL4
	TAPBP				AKT2				CCR1				CDC42				XCR1
	IKBKE				BUB1B				CREB3L2				JUN				CSF2RA
	ZNF382				CCND1				NRAS				IL6				IL2RA
	TP53				HLA-DRB1				IL6				HCLS1				CXCR5
	TAP1				SRF				CDK6				IL1B				CXCL14
	HLA-DRB5				ANAPC15				PTGER4				MYO1F				BMP8A
	ZNF107				CCNA2				IL1B				CYTH1				CSF1R
	POU2F1				TP53				HLA-F				ACTB				TGFB1
	TSC2				HLA-DRB5				CCL3L3				MAPK10				TNFRSF21
	IFIH1				JAK3				SOS2				WASF2				CD40LG
	BAK1				LCK				TNF				TNF				CSF2RB
	PIK3R1				SLC25A6				TAP2				CASP4				CCL3
	ZNF717				CDC20				GNG7				SEC24D				CCR2
	OAS3				PIK3R1				CXCL12				FYN				CX3CR1
	SRSF8				CCNE2				CREB3				NCL				IL16
	ZNF814				CREB3L2				HLA-C				CASP3				CCR1
	IL6				JUN				CASP3				TNFSF10				CCR4
	HCFC1				CCND3				PIK3CD				PYCARD				CXCR3
	IL1B				NRAS				GNAI2				SLC9A3R1				CXCL16
	HLA-F				IL6				NFATC3				SEC24A				IL6
	ZNF675				HLA-F				RB1				TLR5				IL1RN
	ZNF43				CRTC1				CALM2				FAS				IL21R
	ZNF135				SPI1				ADCY7				PAK1				IL1B
	TNF				MAPK10				FAS				NAIP				CCL3L3
	TAP2				CHEK1				VEGFA				BRK1				CCL8
	HLA-DQB1				TNF				ITPR3				ABI1				TNFSF15
	LTA				HLA-DQB1				CALR								TNF
	ZNF564				LTA				SOS1								LTA
	IRF9				CREB3				GNB1								CCL22
	ZNF624				HLA-C				PRKACB								IL4R
	HLA-C				TSPO				GSK3B								CXCL12
	ZNF195				PIK3CD				CREB5								IL5RA
	DDX58				CDC27				ROCK1								CXCR6
	ZNF597				NFATC3				AKT1								CCR6
	ZNF480				RB1				CALM1								XCL2
	CASP3				ETS1				PTGER2								EBI3
	PIK3CD				ADCY7				GNA11								IL7
	TLR2				MMP7				B2M
	JAK2				VAC14				BID
	ZNF275				MAD2L1				CX3CL1
	ZNF175				TBP				ARHGEF11
	TRAF3				CRTC3				PIK3R2
	FAS				ICAM1				ITGB3
	ZNF547				CALR				CCR5
	ZNF567				ELK4				CASP9
	ZNF596				PRKACB				NFKBIA
	ZNF548				CREB5				ATF2
	IFNG				CCND2				RELA
	ZNF714				CANX				PLCB1
	EIF2AK3				AKT1				GRB2
	BCL2				MAPK8				NFATC1
	ZNF528				PTEN				ITPR1
	CALR				SLC2A1				CYCS
	ZNF850				B2M				FASLG
	POU2F2				CDC16				MDM2
	ZNF708				CRTC2				GNB2
	EIF2AK1				ANAPC4				GNG4
	ZNF334				PIK3R2				RAC1
	ZNF101				CD40				IRF3
	SRSF6				PTTG1
	EIF2AK4				TRRAP
	ZNF454				ATM
	ZNF257				NFKBIA
	ZFP90
	ZNF33A
	ZNF705A
	ZNF616
	AKT1
	ZNF251
	ZNF226
	SP100
	ZNF189
	ZNF284
	ZNF267
	B2M
	BID
	ZNF256
	ZNF268
	EIF2AK2
	ZNF486
	ZNF484
	ZNF641
	IRAK4
	ZNF791
	ZNF432
	PIK3R2
	ITGB3
	ZNF684
	ZNF543
	SOCS3
	ZNF492
	ZNF317
	ZNF234
	ZNF253
	ZNF570
	CASP9
	NFKBIA
	ZNF763
	ZNF140
	ZNF716
	TLR9
	C5
	ZNF585A
	ZNF426
	ZNF589
	ZNF506
	ZNF416
	ZNF57
	ZNF154
	RELA
	ZNF93
	ZNF91
	CYCS
	TNFRSF14
	ZNF730
	ZNF649
	FASLG
	ZNF132
	ZNF354B
	MAP3K7
	ZNF510
	IRF3
	IFNAR2
	BAX
	ZNF304
	ZNF610
	ZNF726
	DAXX
	ZNF211
	ZNF254
	SRSF2
	ZNF583
	MTOR

## Sheet: Organized gene lists
Overlapping KEGG terms	Counts	Genes
Herpes simplex virus 1 infection	2	TNF
Human T-cell leukemia virus 1 infection		IL6
Human cytomegalovirus infection
Pathogenic Escherichia coli infection
Cytokine-cytokine receptor interaction
Herpes simplex virus 1 infection	1	IL1B
Human cytomegalovirus infection
Pathogenic Escherichia coli infection
Cytokine-cytokine receptor interaction
Herpes simplex virus 1 infection	11	HLA-F
Human T-cell leukemia virus 1 infection		TP53
Human cytomegalovirus infection		CALR
		AKT1
		PIK3R1
		B2M
		AKT2
		NFKBIA
		HLA-C
		PIK3CD
		PIK3R2
Herpes simplex virus 1 infection	1	LTA
Human T-cell leukemia virus 1 infection
Cytokine-cytokine receptor interaction
Herpes simplex virus 1 infection	4	BAK1
Human cytomegalovirus infection		FAS
Pathogenic Escherichia coli infection		CASP8
		CASP3
Herpes simplex virus 1 infection	2	CCL5
Human cytomegalovirus infection		CCL2
Cytokine-cytokine receptor interaction
Herpes simplex virus 1 infection	12	HLA-DMA
Human T-cell leukemia virus 1 infection		HLA-DPA1
		HLA-DRB1
		HLA-DRB5
		HLA-DOA
		HLA-DMB
		HLA-DOB
		HLA-DPB1
		HLA-DRA
		HLA-DQA2
		HLA-DQA1
		HLA-DQB1
Herpes simplex virus 1 infection	12	FASLG
Human cytomegalovirus infection		BID
		CYCS
		CASP9
		TRAF5
		TAP2
		ITGB3
		IRF3
		TAP1
		TSC2
		RELA
		TAPBP
Herpes simplex virus 1 infection	1	MYD88
Pathogenic Escherichia coli infection
Human T-cell leukemia virus 1 infection	10	CREB3L2
Human cytomegalovirus infection		ADCY7
		CREB3
		CCND1
		NFATC3
		PRKACB
		RB1
		NRAS
		NFATC2
		CREB5
Human T-cell leukemia virus 1 infection	3	FOS
Pathogenic Escherichia coli infection		JUN
		MAPK10
Human T-cell leukemia virus 1 infection	5	CD4
Cytokine-cytokine receptor interaction		IL2RA
		TGFB1
		IL2RB
		IL2RG
Human cytomegalovirus infection	8	IL10RA
Cytokine-cytokine receptor interaction		CXCR4
		CCR1
		CCL3L3
		CCL4
		CCL4L1
		CXCL12
		CCL3
Pathogenic Escherichia coli infection	1	IL18
Cytokine-cytokine receptor interaction
Herpes simplex virus 1 infection	113	SRSF2
		MTOR
		ZNF416
		ZNF548
		ZNF684
		ZNF492
		ZNF610
		EIF2AK1
		ZNF140
		EIF2AK2
		OAS3
		ZNF189
		ZNF107
		OAS1
		ZNF564
		TLR9
		ZNF528
		C5
		ZNF93
		MAP3K7
		ZNF254
		ZNF649
		ZNF726
		ZNF567
		ZNF597
		BST2
		ZNF510
		ZNF717
		ZNF506
		DDX58
		ZNF454
		SP100
		JAK2
		ZNF234
		IFIH1
		ZNF354B
		ZNF135
		ZNF43
		ZNF253
		ZNF268
		ZNF257
		ZNF101
		ZNF791
		ZNF317
		ZNF714
		ZNF132
		ZFP90
		ZNF763
		ZNF484
		ZNF154
		SRSF6
		ZNF814
		ZNF570
		ZNF596
		IFNG
		ZNF226
		ZNF624
		ZNF211
		BCL2
		ZNF175
		ZNF860
		IFNAR2
		ZNF705A
		ZNF91
		ZNF284
		OAS2
		POU2F1
		ZNF480
		TLR2
		CD74
		ZNF195
		TRAF3
		ZNF426
		ZNF589
		ZNF334
		IRAK4
		IRF9
		SOCS3
		ZNF547
		ZNF716
		ZNF57
		ZNF256
		DAXX
		ZNF382
		ZNF486
		ZNF33A
		ZNF675
		PILRA
		ZNF641
		BAX
		POU2F2
		ZNF267
		ZNF616
		IKBKE
		STAT1
		ZNF585A
		EIF2AK3
		TLR3
		TNFRSF14
		SRSF8
		ZNF850
		ZNF432
		ZNF543
		ZNF251
		HCFC1
		ZNF583
		EIF2AK4
		ALYREF
		ZNF304
		ZNF730
		BIRC3
		ZNF275
		ZNF708
Human T-cell leukemia virus 1 infection	45	CDC16
		CDC27
		VAC14
		PTEN
		MMP7
		ZFP36
		CRTC3
		LCK
		ANAPC4
		EGR2
		JAK3
		CANX
		CCND2
		SPI1
		TSPO
		CCNB2
		ANAPC15
		CRTC2
		ATM
		CRTC1
		CHEK1
		CDC20
		ITGB2
		CD3D
		TBP
		MAPK8
		ICAM1
		CD40
		CCNA2
		CCNE2
		SLC25A6
		ETS1
		CD3E
		TRRAP
		SRF
		CCND3
		PTTG1
		ITGAL
		EGR1
		SLC2A1
		ANAPC5
		ELK4
		BUB1B
		MAD2L1
		CD3G
Human cytomegalovirus infection	35	ROCK1
		ARHGEF11
		SOS1
		RAC1
		CDK6
		PLCB2
		PTK2B
		GNAI2
		PTGER2
		PRKCB
		PLCB1
		CCR5
		NFATC1
		RAC2
		ITPR1
		PTGS2
		MDM2
		GNG4
		GNB1
		GRB2
		GNG2
		ATF2
		VEGFA
		SOS2
		CX3CL1
		GNA11
		GNB2
		CALM1
		CALM2
		GSK3B
		PRKCA
		PTGER4
		GNG7
		ITPR3
		GNAO1
Pathogenic Escherichia coli infection	40	ACTB
		ARPC2
		SEC24D
		PAK1
		FCGR2A
		CYTH1
		TAB3
		FYN
		MYO1F
		NAIP
		NLRP3
		CASP1
		MYO1G
		CLDN16
		CYTH2
		MYO5A
		CLDN1
		TLR5
		CDC42
		WIPF1
		ABI1
		TNFSF10
		MYO5B
		LPAR5
		NCKAP1L
		CASP4
		SEC24A
		BRK1
		CYFIP2
		NCL
		ARPC1B
		LOC102723407
		PYCARD
		SLC9A3R1
		PTPN6
		CLDN7
		WASF2
		TMED10
		HCLS1
		CYTH4
Cytokine-cytokine receptor interaction	43	IL7R
		XCL1
		CXCL10
		CCL21
		IL16
		CXCL14
		IL4R
		EBI3
		BMP8A
		CCR2
		CCL18
		CCR6
		CXCL13
		CCL22
		CD27
		TNFRSF17
		CSF2RA
		CCL19
		IL21R
		TNFRSF9
		CXCR6
		CXCR3
		CCL8
		TNFSF13B
		CX3CR1
		TNFSF15
		TNFSF8
		CXCL9
		CSF1R
		CXCL16
		TNFRSF21
		CCL28
		CD40LG
		CXCL11
		IL7
		CSF2RB
		CCR7
		IL5RA
		XCL2
		IL1RN
		XCR1
		CCR4
		CXCR5
